# Supplementary material for: Probing Vasoreactivity and Hypoxic Phenotype in Different Tumor Grafts Grown on the Chorioallantoic Membrane of the Chicken Embryo In Ovo Using MRI
Source: MDPI journal article supplement (doi:10.3390/cancers14133114), 2022-06-25
Supplement: s1 [file s1]

Supplementary Material

# Probing Vasoreactivity and Hypoxic Phenotype in Different Tumor Grafts Grown on the Chorioallantoic Membrane of the Chicken Embryo in ovo Using MRI

Johanna Buschmann <sup>1,2,\*</sup>, Dorothea M. Heuberger <sup>3</sup>, Fatma Kivrak Pfiffner <sup>4</sup>, Petra Wolint <sup>1,2</sup>, Jae-Hwi Jang <sup>5</sup>, Wolfgang Jungraithmayr <sup>5,6</sup>, Pietro Giovanoli <sup>2</sup>, Maurizio Calcagni <sup>2</sup> and Conny F. Waschkies <sup>1,7</sup>

- <sup>1</sup> Center for Surgical Research, University Hospital Zurich, 8091 Zurich, Switzerland; petra.wolint@usz.ch (P.W.); conny.waschkies@usz.ch (C.F.W.)
  - <sup>2</sup> Plastic Surgery and Hand Surgery, University Hospital Zurich, 8091 Zurich, Switzerland; pietro.giovanoli@usz.ch (P.G.); maurizio.calcagni@usz.ch (M.C.)
  - <sup>3</sup> Institute of Intensive Care Medicine, University Hospital Zurich, 8091 Zurich, Switzerland; dorotheamonika.heuberger@usz.ch
  - <sup>4</sup> Institute of Medical Molecular Genetics, University of Zurich, 8091 Zurich, Switzerland; kivrakpfiffner@medmolgen.uzh.ch
  - <sup>5</sup> Thoracic Surgery, University Hospital Zurich, 8091 Zurich, Switzerland; jaehwi.jang@hotmail.com (J.-H.J.); wolfgang.jungraithmayr@usz.ch (W.J.)
  - <sup>6</sup> Department of Thoracic Surgery, University Hospital Freiburg, 79117 Freiburg, Germany
  - <sup>7</sup> Institute for Biomedical Engineering, ETH and University of Zurich, 8093 Zurich, Switzerland
- \* Correspondence: johanna.buschmann@usz.ch; Tel.: +41-44-2559895

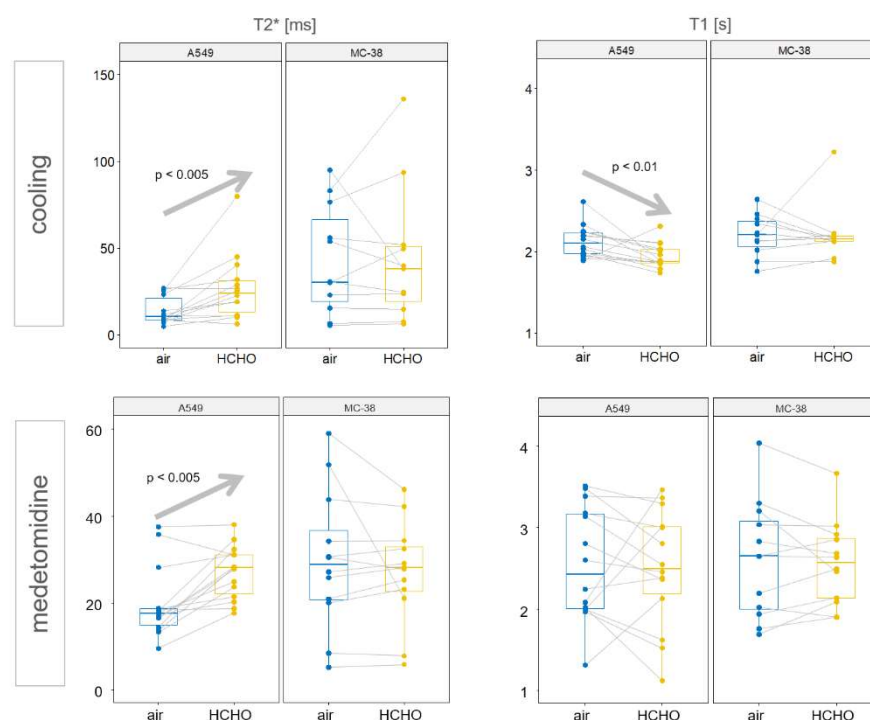

**Figure S1.** Comparison of sedation protocols and their impact on HCHO gas challenge for A549 and MC-38 tumor grafts. Sedation with medetomidine was compared with sedation by cooling at 4 °C. Impact on T1 and T2\* for selected samples was assessed. *p* values refer to Wilcoxon test statistics; arrows indicate observed trends and changes upon gas challenge.

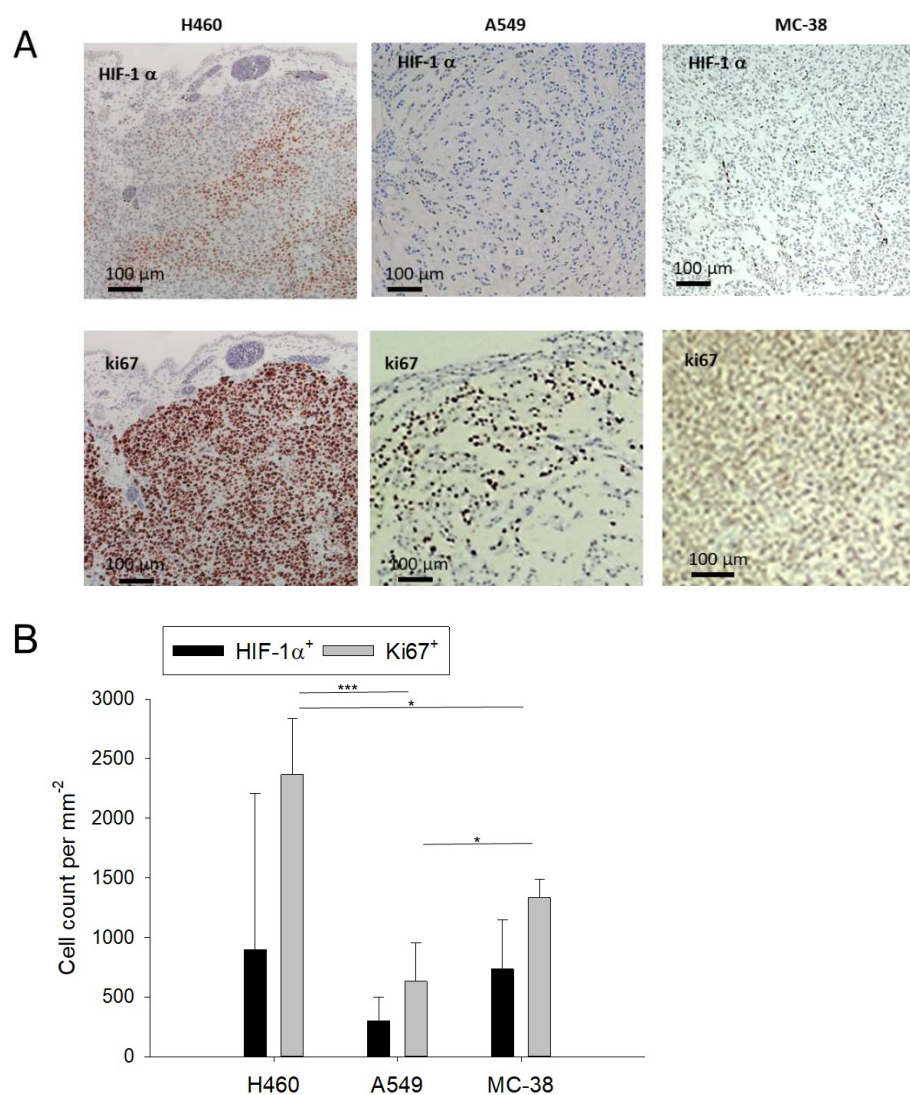

**Figure S2.** Immunohistochemical staining of H460, A549 and MC-38 tumor tissues grown on the CAM. Image taken at 100 $\times$  magnification for a representative field of view. In the core tissue of H460 and MC-38 tumors, hypoxic areas are visible (numerous HIF-1 $\alpha$ -positive brown cells), while in A549 tumors, only a few HIF-1 $\alpha$ <sup>+</sup> cells can be seen. ki67, as a proliferation marker, shows that practically all H460 and MC-38 cells were proliferating (ki67-positive brown cells), while the pattern for A549 tumors was patchier in this regard (A). Quantitative assessment revealed no significant differences in HIF-1 $\alpha$ <sup>+</sup> cells per area, while ki67<sup>+</sup> cell density was significantly different for all three tumor types (B). One-way ANOVA;  $p < 0.05$  (\*),  $p < 0.01$  (\*\*) and  $p < 0.001$  (\*\*\*).
